# Supplementary material
Source: publisher figshare collection journal article supplement (https://acs.figshare.com/ndownloader/files/20567109)
Supplement: Supplementary file 1 [file 20567109]

SUPPORTING INFORMATION

# Ultrasmall Ni-promoted WS<sub>2</sub> nanocatalyst with enhanced number of edge atoms for hydrodesulfurization

*Rupesh Singh<sup>1</sup>, Shalini Arora<sup>1</sup>, Deepak Kunzru<sup>1a\*</sup>, Sri Sivakumar<sup>1, 2\*</sup>*

*<sup>1</sup>Department of Chemical Engineering, Indian Institute of Technology Kanpur, Kanpur- 208016 (UP), India*

*<sup>2</sup>Material Science Programme, DST Thematic Unit of Excellence on Soft Nanofabrication, Centre for Environmental Science & Engineering, Indian Institute of Technology Kanpur, Kanpur- 208016 (UP), India.*

<sup>a</sup> Present address: School of Engineering & Applied Science, Ahmedabad University, Ahmedabad 380009.

\*Corresponding author. Tel.: +91 512 2597697; fax: +91 512 2590104

E-mail address: dkunzru@iitk.ac.in, srisiva@iitk.ac.in

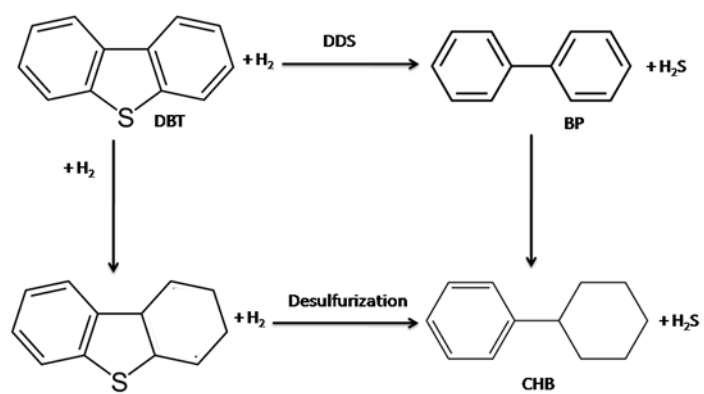

**Figure S1.** Reaction pathways for the hydrodesulfurization of dibenzothiophene

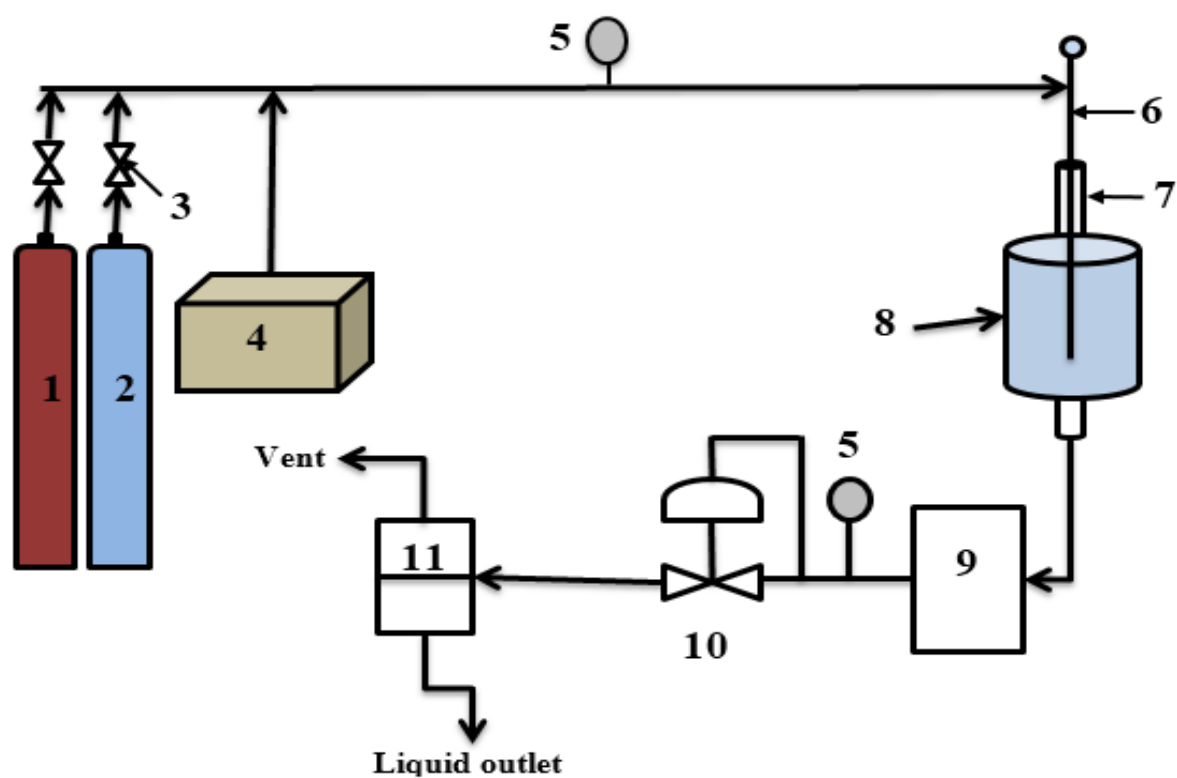

1) Hydrogen Cylinder 2) Helium Cylinder 3) Mass flow controller 4) HPLC pump 5) Pressure gauge 6) Thermocouple 7) Reactor 8) Furnace 9) Condenser 10) Back pressure regulator 11) Gas liquid separator

**Figure S2.** Schematic diagram of experimental setup

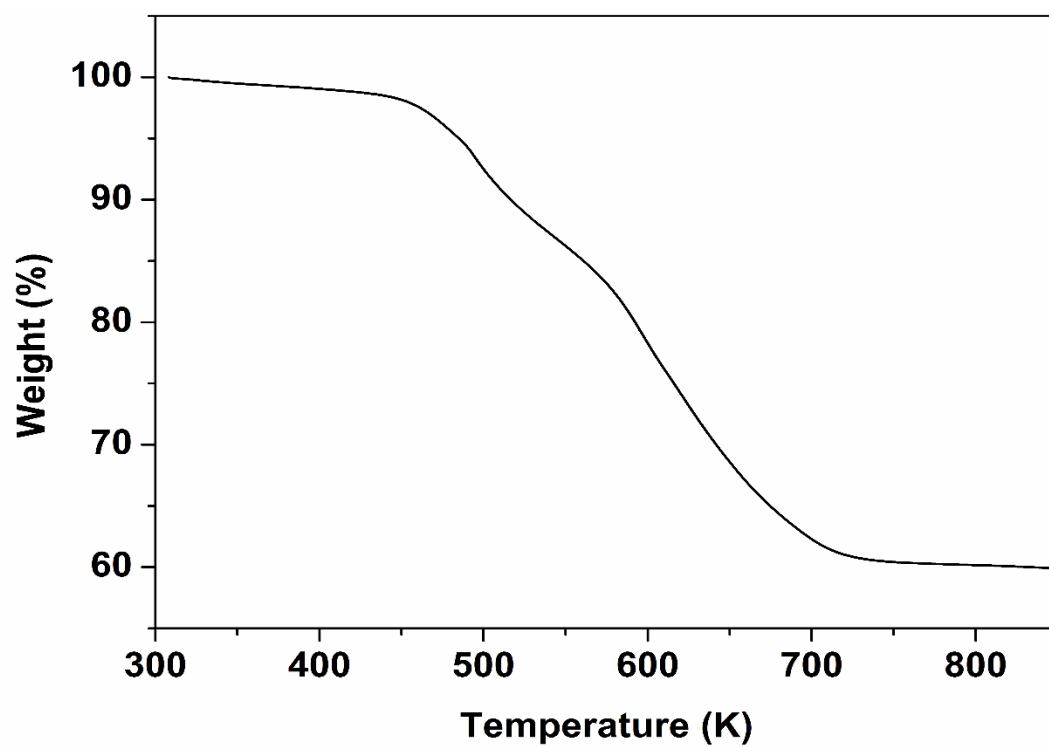

**Figure S3.** TGA analysis of unsupported Ni-promoted WO<sub>3</sub> nanoclusters

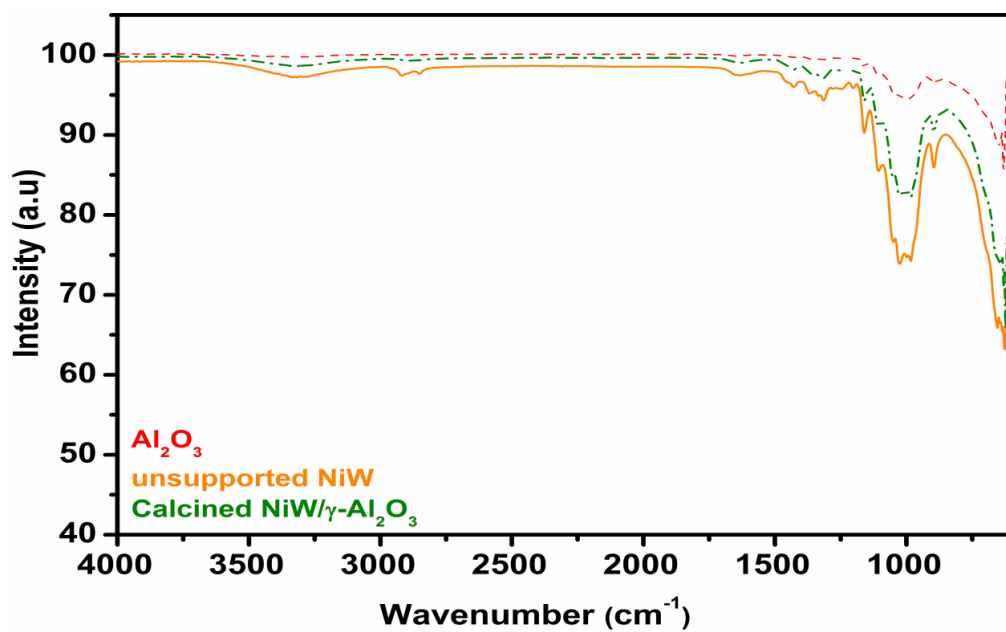

Figure S4. FT-IR spectra of Ni-promoted  $\text{WO}_3$  nanoclusters

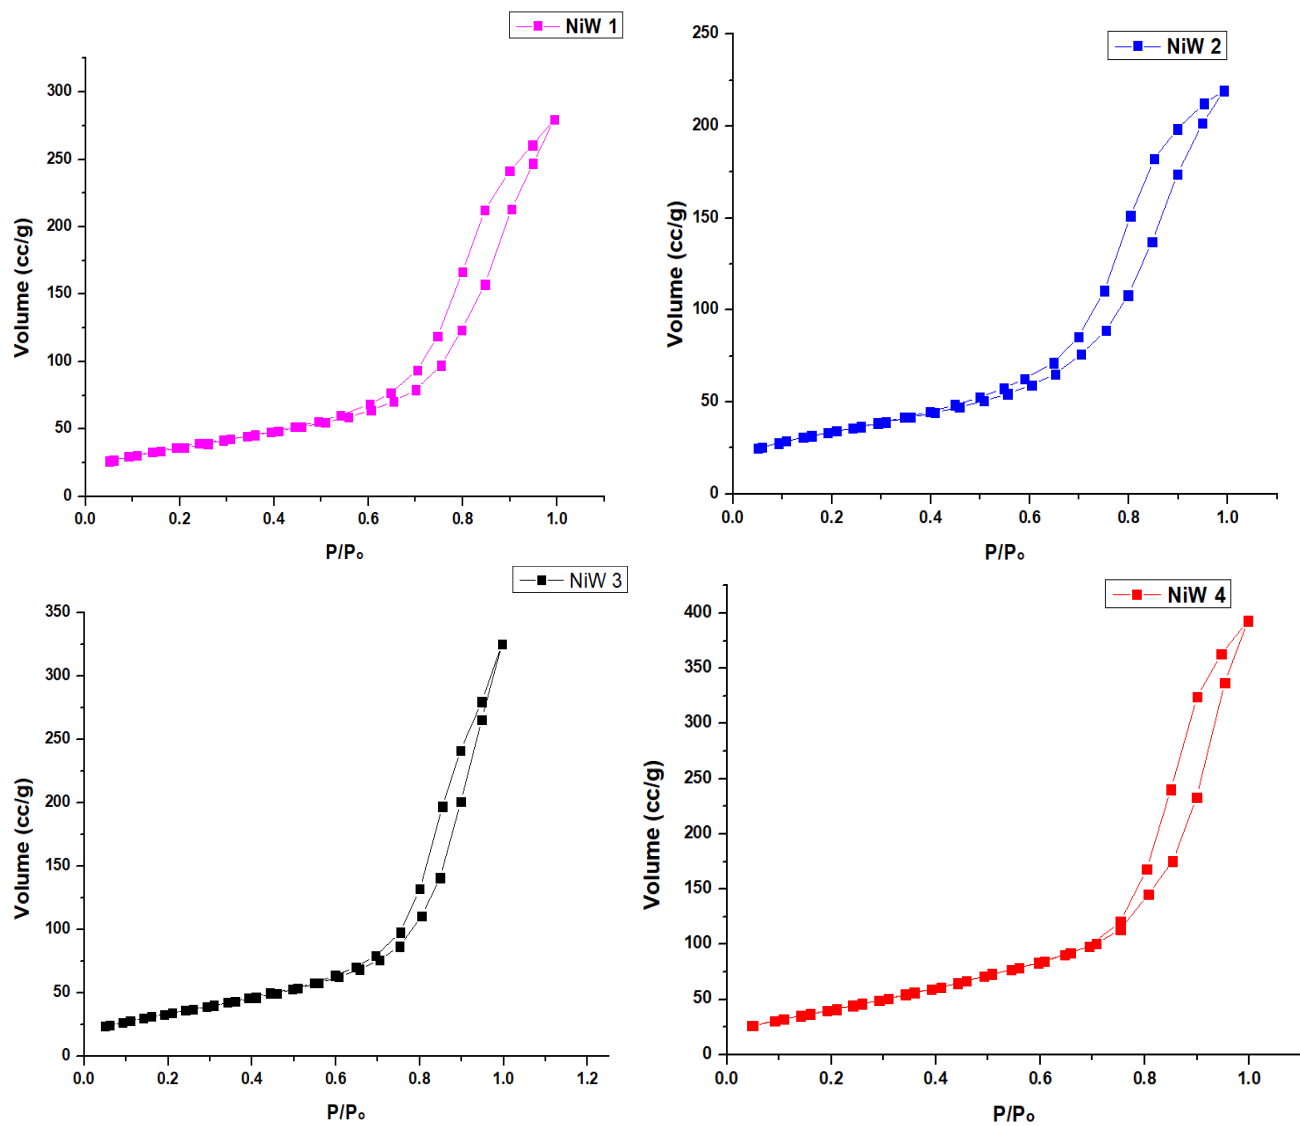

**Figure S5.** Physisorption isotherms of NiW 1-4 catalysts

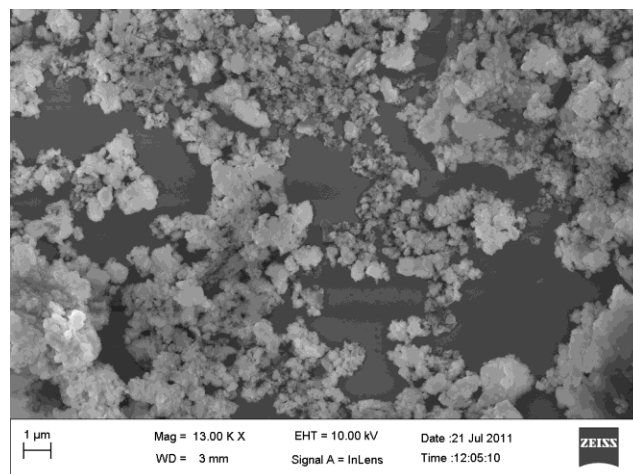

**Figure S6.** SEM image of NiW 2 catalyst

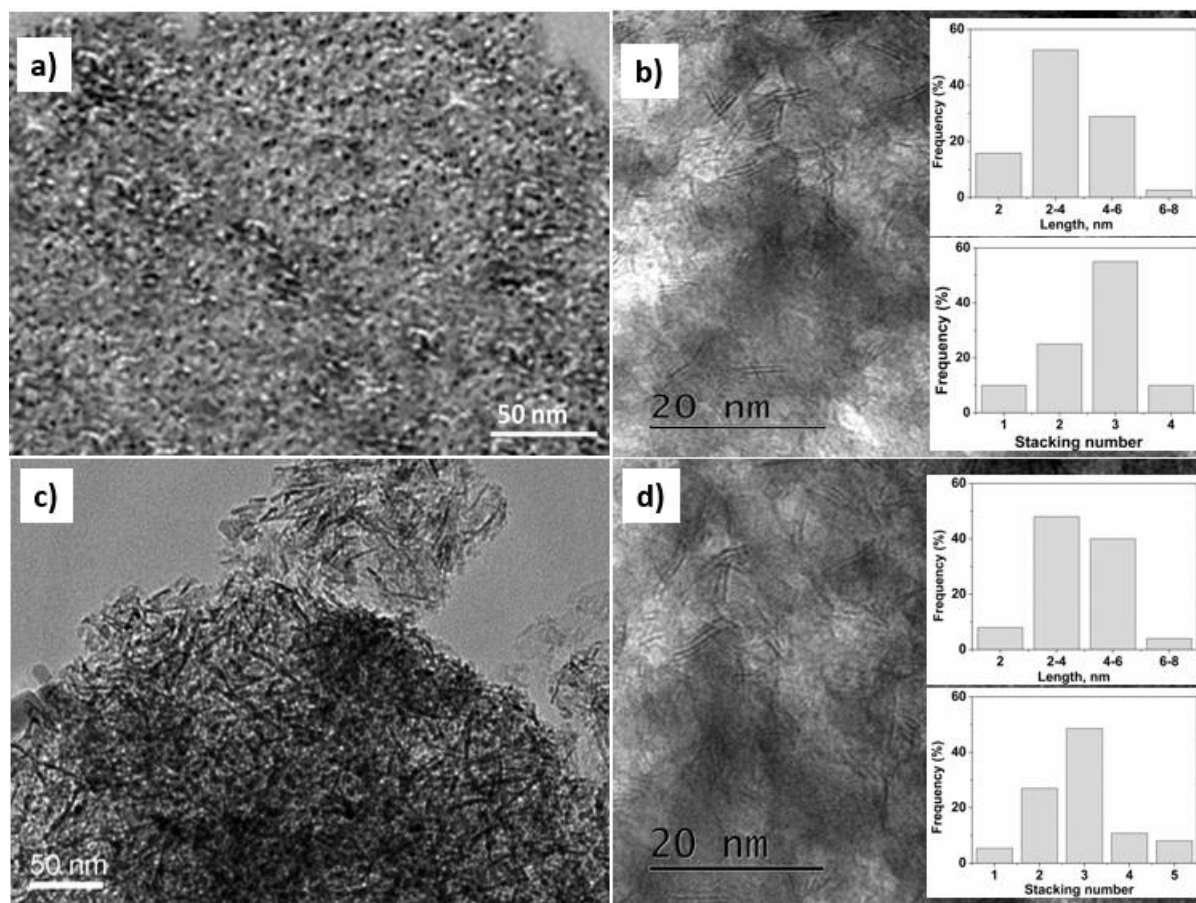

**Figure S7.** HRTEM images a) NiW 2 b) sulfided-NiW 2 c) NiW C1 d) sulfided NiW C1



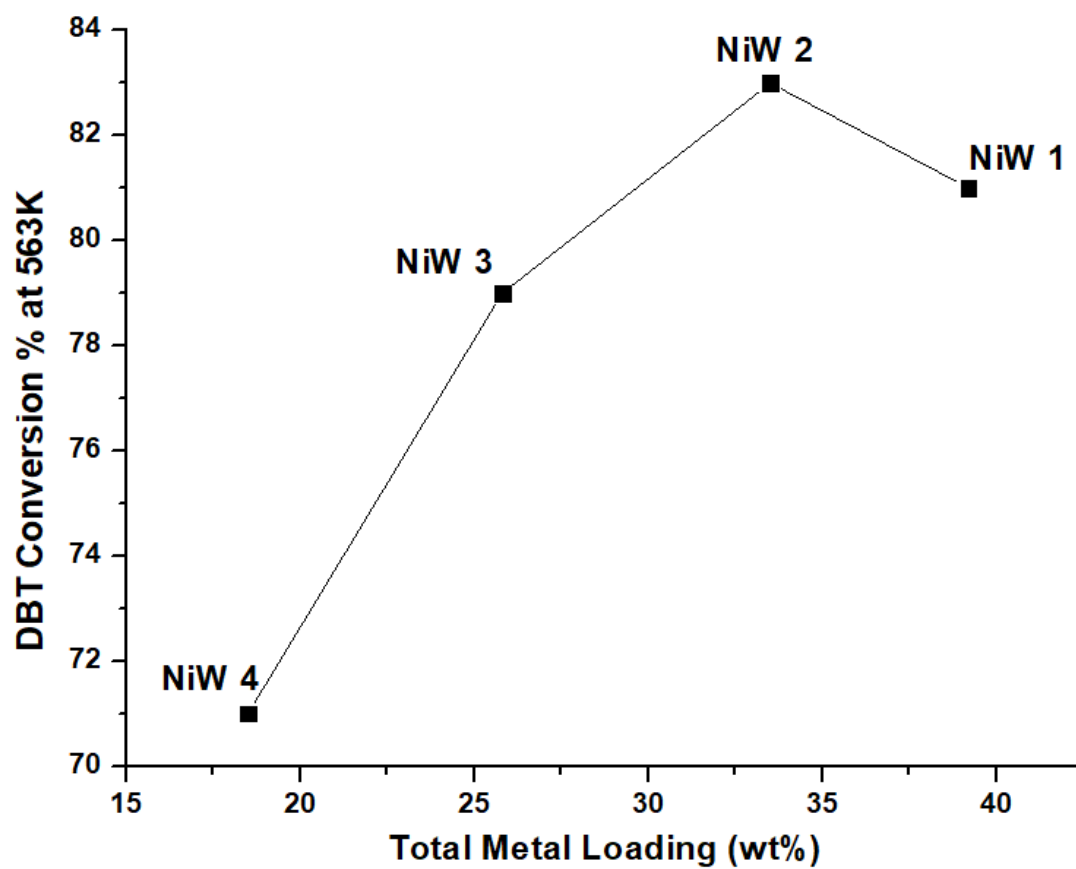

**Figure S8.** DBT conversion vs. total metal loading plot at 563K temperature

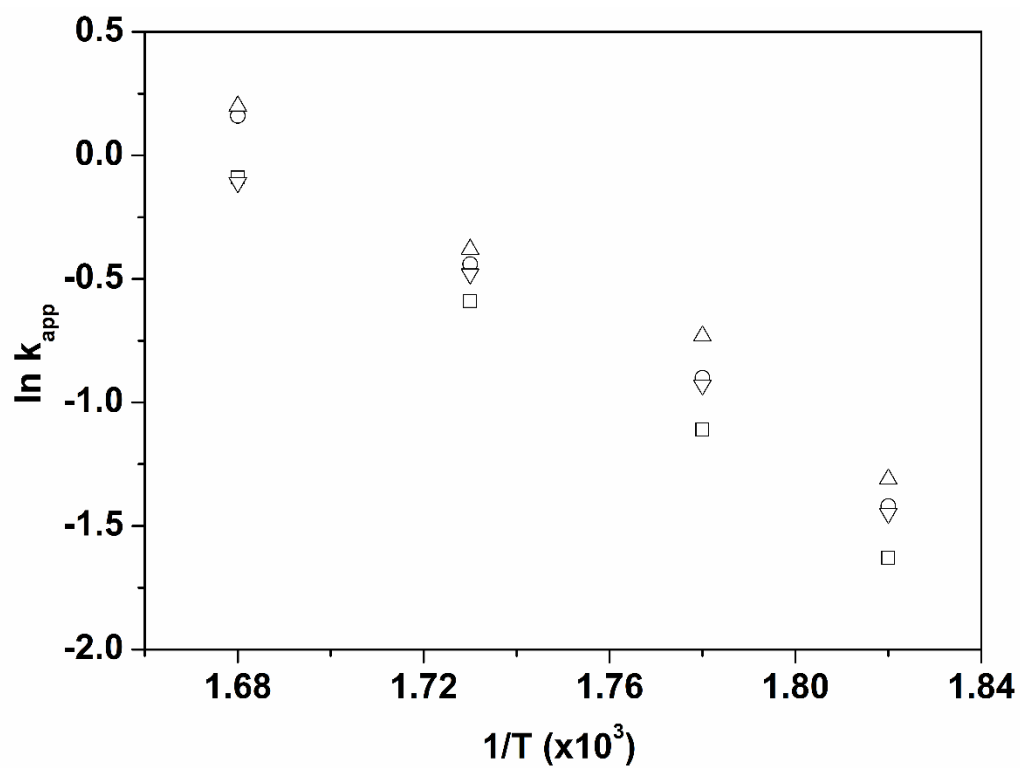

**Figure S9.** Arrhenius plot for the different Ni-promoted WS<sub>2</sub> nanocatalyst. NiW 1( $\square$ ); NiW 2( $\circ$ ); NiW 3( $\triangle$ ) and NiW 4 ( $\nabla$ )

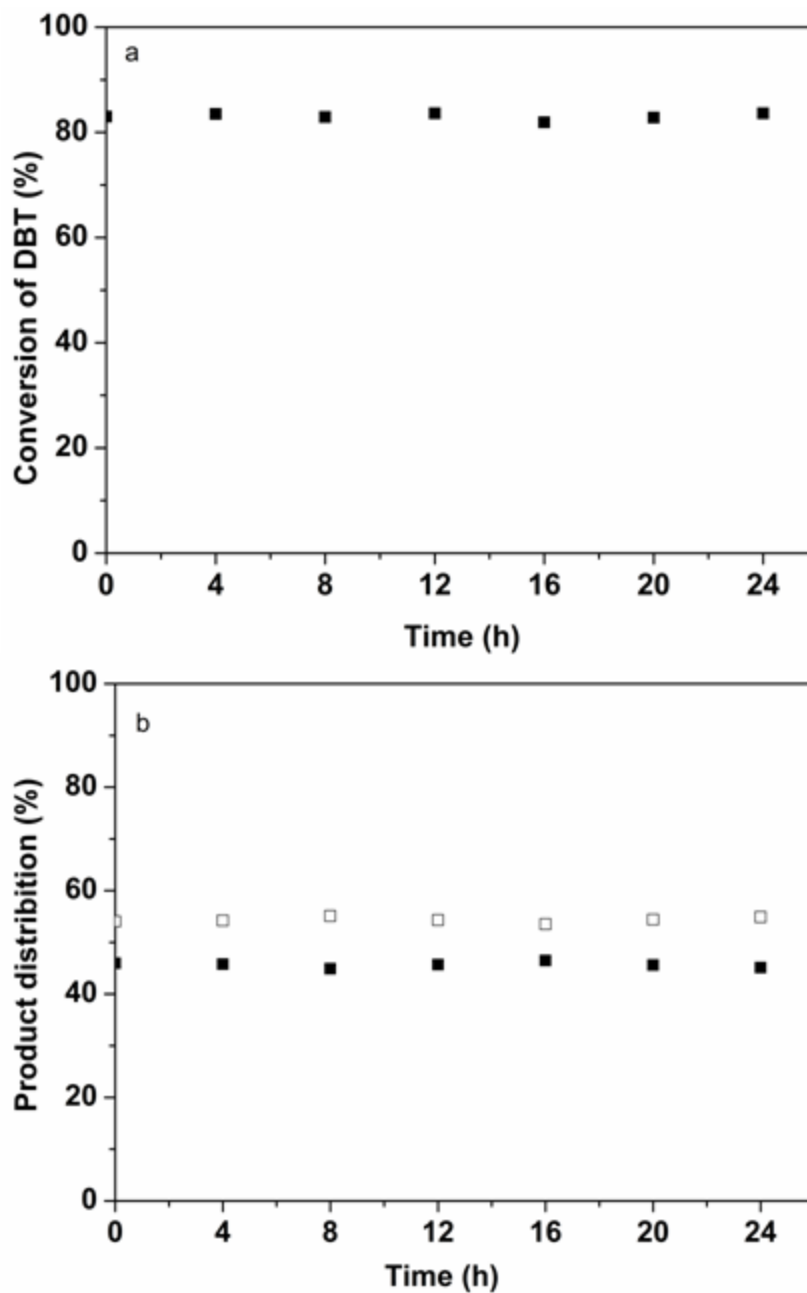

**Figure S10.** Stability test for Ni-promoted WS<sub>2</sub> nanocatalyst under HDS reaction conditions (T= 563 K, amount of catalyst used= 150 mg, W/F<sub>A0</sub>= 2.38 x10<sup>2</sup> (kg cat.h/(kmol DBT))). Effect of time on (a) HDS activity, (b) product selectivity

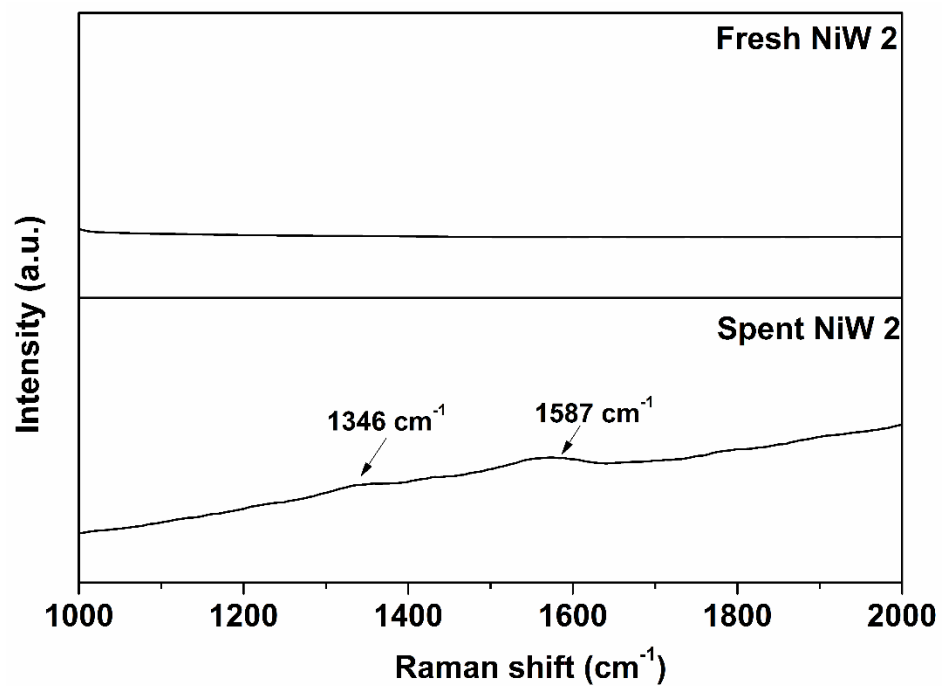

**Figure S11.** Raman spectra of NiW 2 catalyst.

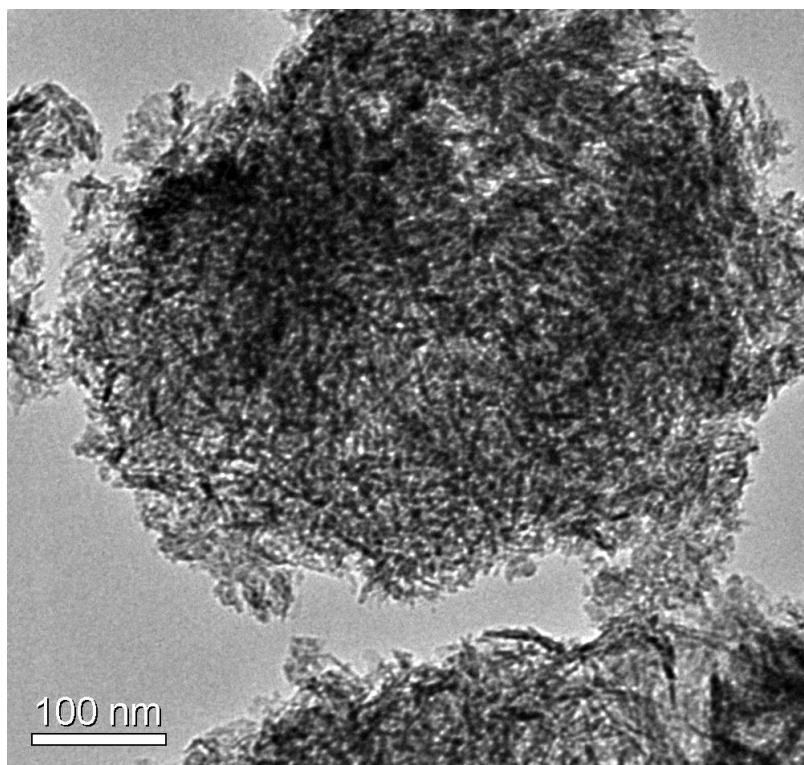

**Figure S12.** HRTEM image of spent NiW 2
